# Supplementary material
Source: publisher figshare collection journal article supplement (https://karger.figshare.com/articles/dataset/_/7067207)
Supplement: Supplementary file 2 [file 1]

## Appendix

### Study Investigators

**Chief Investigator:** K. Toyoda, National Cerebral and Cardiovascular Center

**Investigators and Institutions:** K. Kario and M. Namekawa, Jichi Medical University School of Medicine; J. Nakagawara and K. Kamiyama, Nakamura Memorial Hospital; E. Furui and Y. Yazawa, Kohnan Hospital; Y. Shiokawa and K. Nishiyama, Kyorin University School of Medicine; Y. Hasegawa and H. Akiyama, St Marianna University School of Medicine; S. Okuda and T. Noda, National Hospital Organization Nagoya Medical Center; H. Yamagami and K. Todo, Kobe City General Hospital; K. Kimura and K. Shibasaki, Kawasaki Medical School; Y. Okada and T. Matsushita, National Hospital Organization Kyushu Medical Center; K. Nagatsuka, National Cerebral and Cardiovascular Center

**External Safety Assessment Committee:** T. Kitazono, Kyushu University; T. Hirano, Kumamoto University

**Central Trial Office:** M. Koga, S. Arihiro, S. Sato, M. Naganuma, K. Maeda, M. Mori, T. Nezu, T. Miyagi, K. Endo, M. Osaki, J. Kobayashi, T. Okata, Y. Sakamoto, E. Tanaka, H. Kanai, S. Yoshimura, Y. Yamaguchi, T. Ide, T. Yoshimoto, M. Shiozawa, K. Fujita, M. Kumamoto, D. Ando, T. Kamimura and A. Tokunaga, National Cerebral and Cardiovascular Center

**Supervisory Advisor:** K. Minematsu, National Cerebral and Cardiovascular Center
