# Supplementary material
Source: publisher figshare collection journal article supplement (https://karger.figshare.com/articles/dataset/_/7067207)
Supplement: Supplementary file 3 [file 1]

**Supplementary file 3.** Association of time from imaging to target SBP <160 mmHg with hematoma growth (>33% (**A**) and >6 mL or >33% (**B**)) by logistic regression analysis (1st quartile vs 2nd - 4th quartiles).

**A. Hematoma growth >33%**

|                                                      | Univariate analysis |                | Multivariable analysis * |                |
|------------------------------------------------------|---------------------|----------------|--------------------------|----------------|
|                                                      | OR (95%CI)          | <i>P</i> value | OR (95%CI)               | <i>P</i> value |
| 1st quartile of time from onset to SBP <160 mmHg     | 0.307 (0.089-1.050) | 0.061          | -                        | -              |
| 1st quartile of time from imaging to SBP <160 mmHg   | 0.271 (0.079-0.928) | 0.038          | 0.308 (0.088-1.080)      | 0.066          |
| 1st quartile of time from treatment to SBP <160 mmHg | 0.709 (0.328-1.530) | 0.383          | -                        | -              |

**B. Hematoma growth >6 mL or >33%**

|                                                      | Univariate analysis |                | Multivariable analysis * |                |
|------------------------------------------------------|---------------------|----------------|--------------------------|----------------|
|                                                      | OR (95%CI)          | <i>P</i> value | OR (95%CI)               | <i>P</i> value |
| 1st quartile of time from onset to SBP <160 mmHg     | 0.363 (0.122-1.080) | 0.069          | -                        | -              |
| 1st quartile of time from imaging to SBP <160 mmHg   | 0.318 (0.107-0.945) | 0.039          | 0.345 (0.112-1.060)      | 0.063          |
| 1st quartile of time from treatment to SBP <160 mmHg | 0.859 (0.420-1.760) | 0.677          | -                        | -              |

\* Multivariable analysis adjusted by age, sex, prior antithrombotic medication, initial systolic BP, hematoma volume at baseline, and time from onset to imaging.

Abbreviations: CI, confidence interval; OR, odds ratio; SBP, systolic blood pressure
