# Supplementary material
Source: publisher figshare collection journal article supplement (https://karger.figshare.com/articles/dataset/_/7067207)
Supplement: Supplementary file 4 [file 1]

**Supplementary file 2.** Time from onset to imaging (A-C) and time from imaging to treatment (D-F) according to quartiles of three time indices.

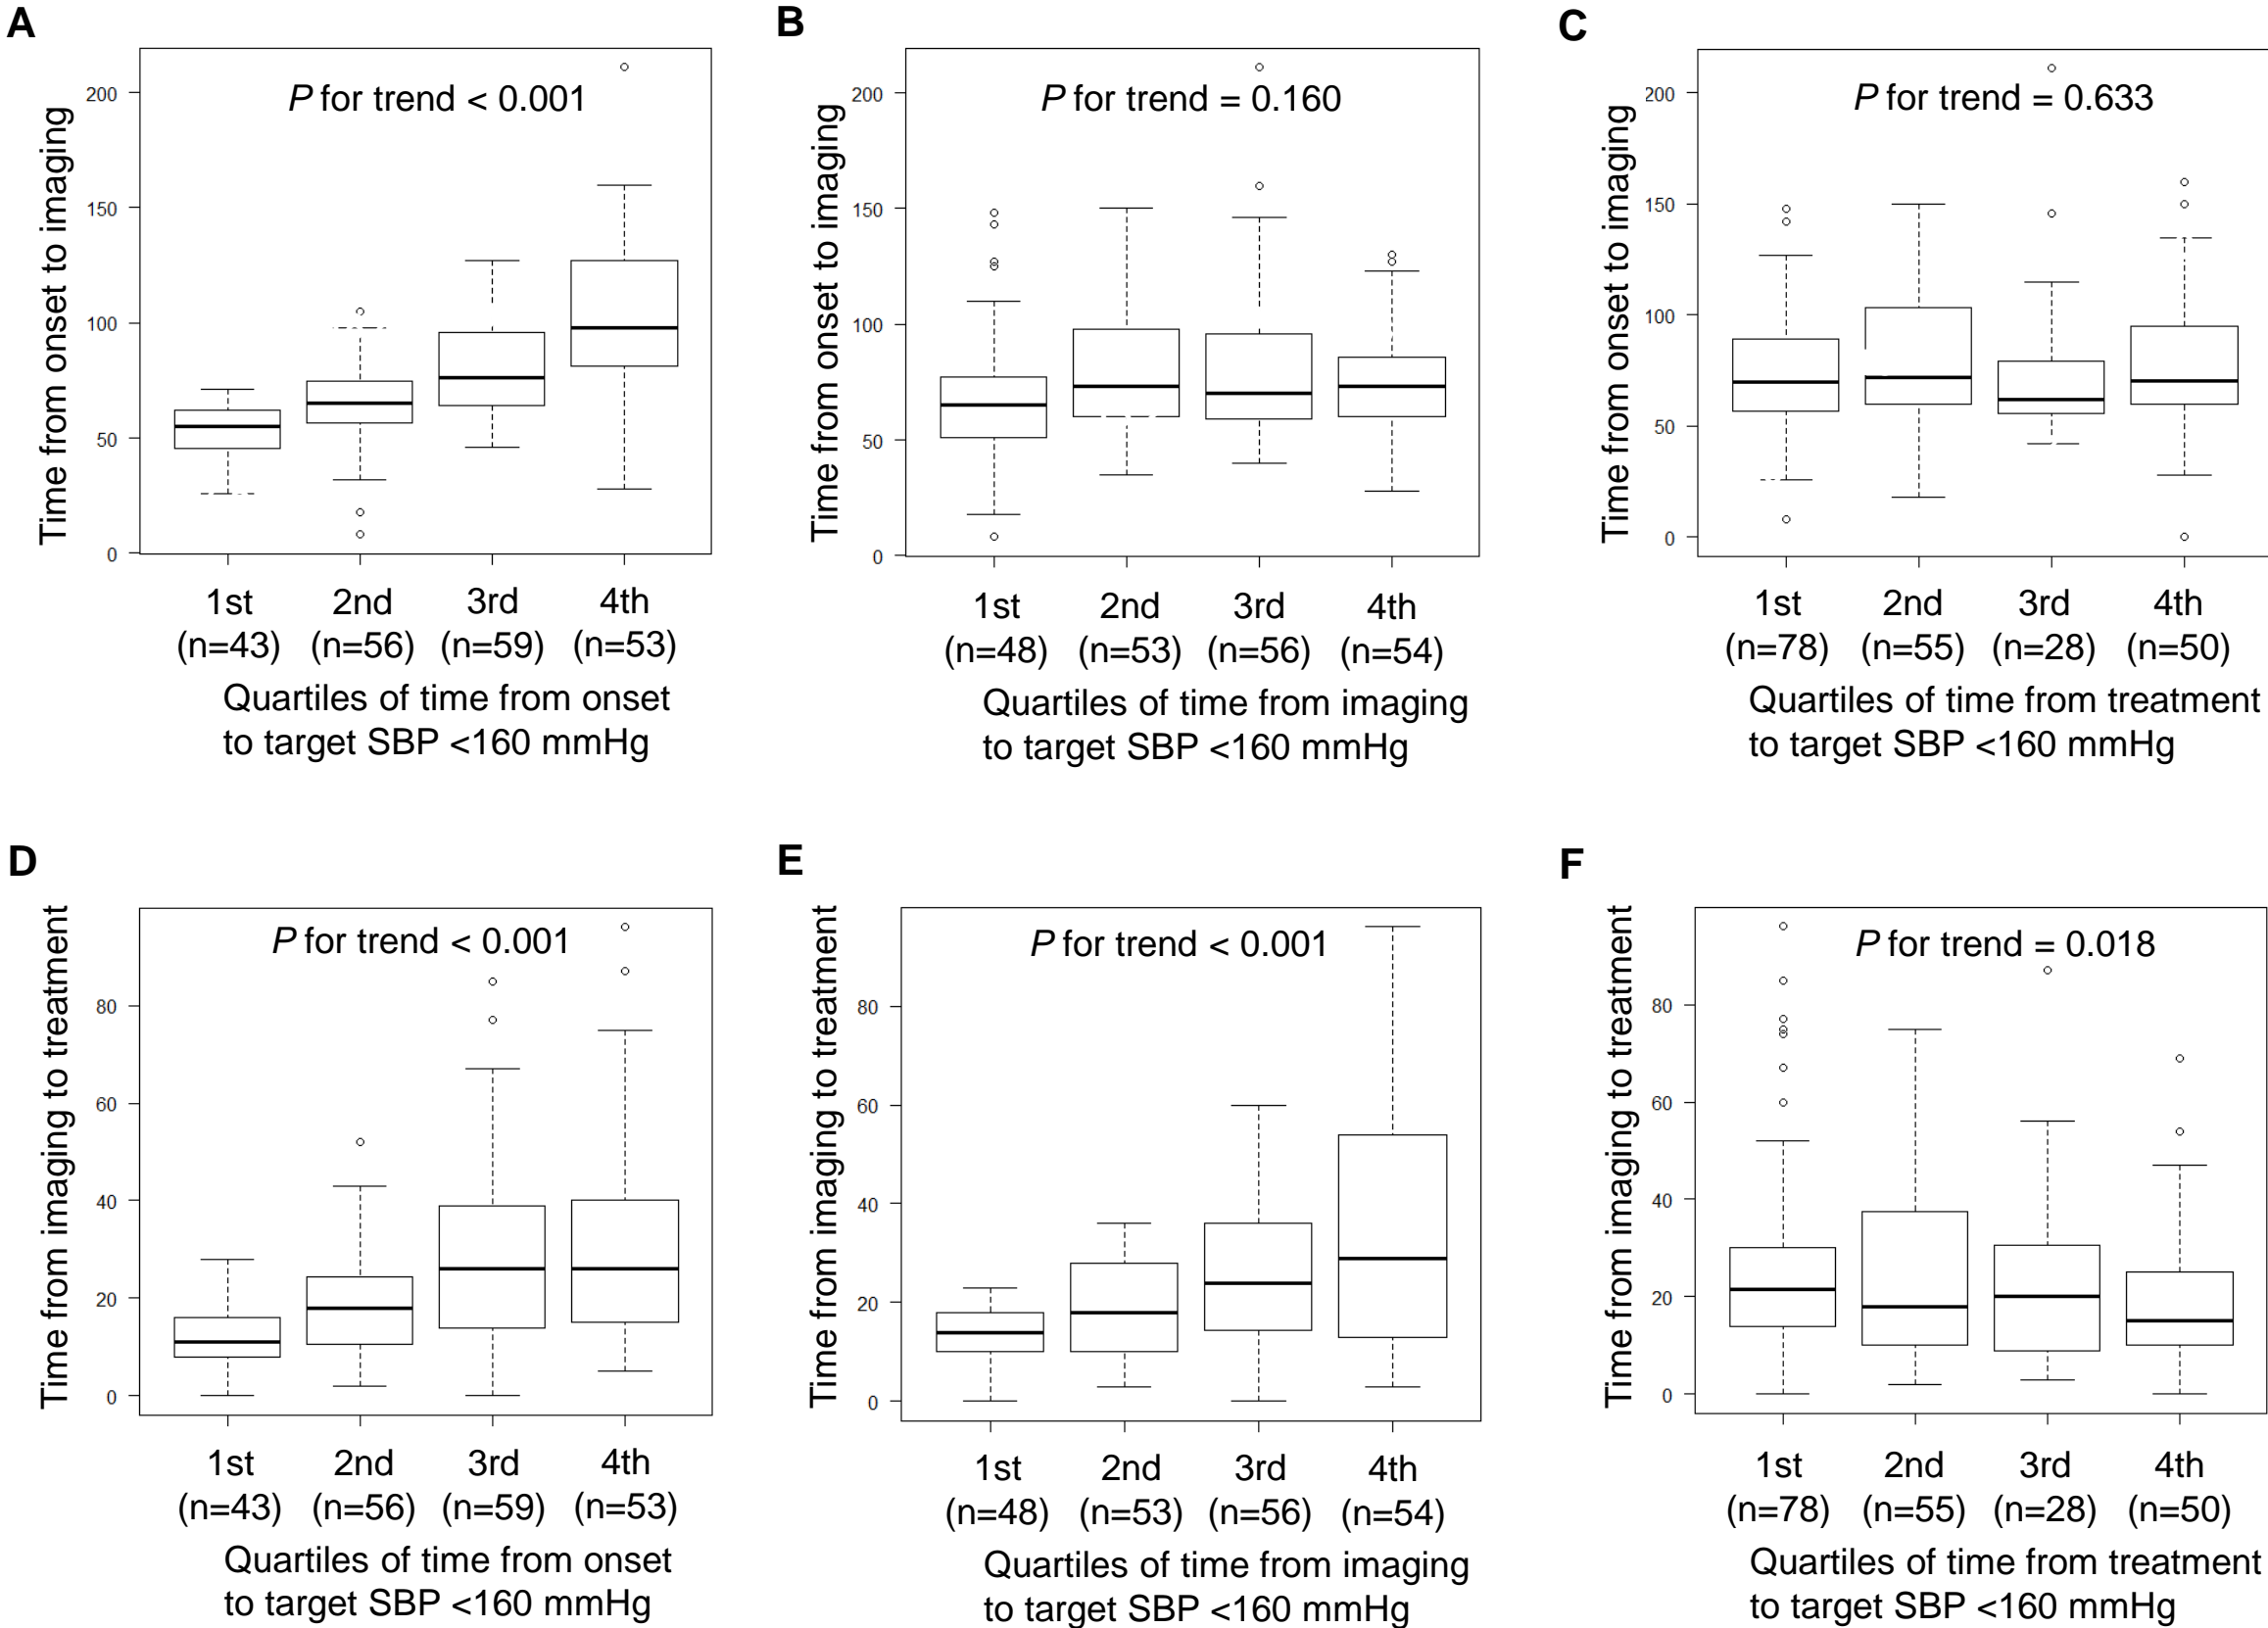

Trend tests were performed using the Jonckheere-Terpstra trend test.
