# Supplementary material
Source: publisher figshare collection journal article supplement (https://karger.figshare.com/articles/dataset/_/7067207)

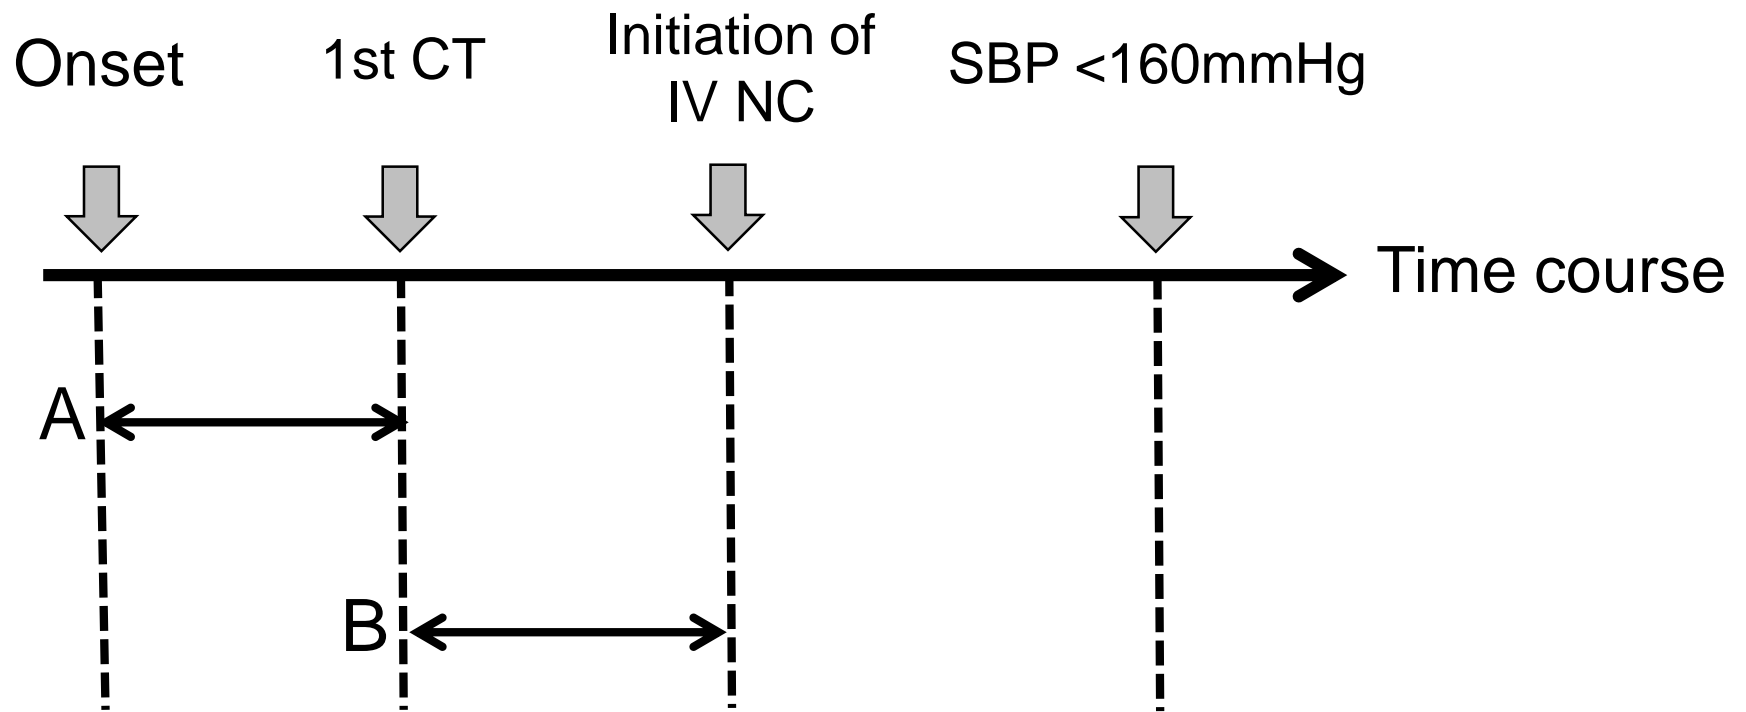

A: Time from onset to imaging  
B: Time from imaging to treatment

Supplement: Supplementary file 1 [file 1]
